# Supplementary material
Source: PubMed Central journal article supplement (PMC3644626)
Supplement: mmc1.pdf [file mmc1.pdf]

## Supplemental Data

### Mutations in *ANTXR1* Cause GAPO Syndrome

Viktor Stránecký, Alexander Hoischen, Hana Hartmannová, Maha S. Zaki, Amit Chaudhary, Enrique Zudaire, Lenka Nosková, Veronika Barešová, Anna Přistoupilová, Kateřina Hodaňová, Jana Sovová, Helena Hůlková, Lenka Piherová, Jayne Y. Hehir-Kwa, Deepthi de Silva, Manouri P. Senanayake, Sameh Farrag, Jiří Zeman, Pavel Martásek, Alice Baxová, Hanan H. Afifi, Brad St. Croix, Han G. Brunner, Samia Temtamy, and Stanislav Kmoč

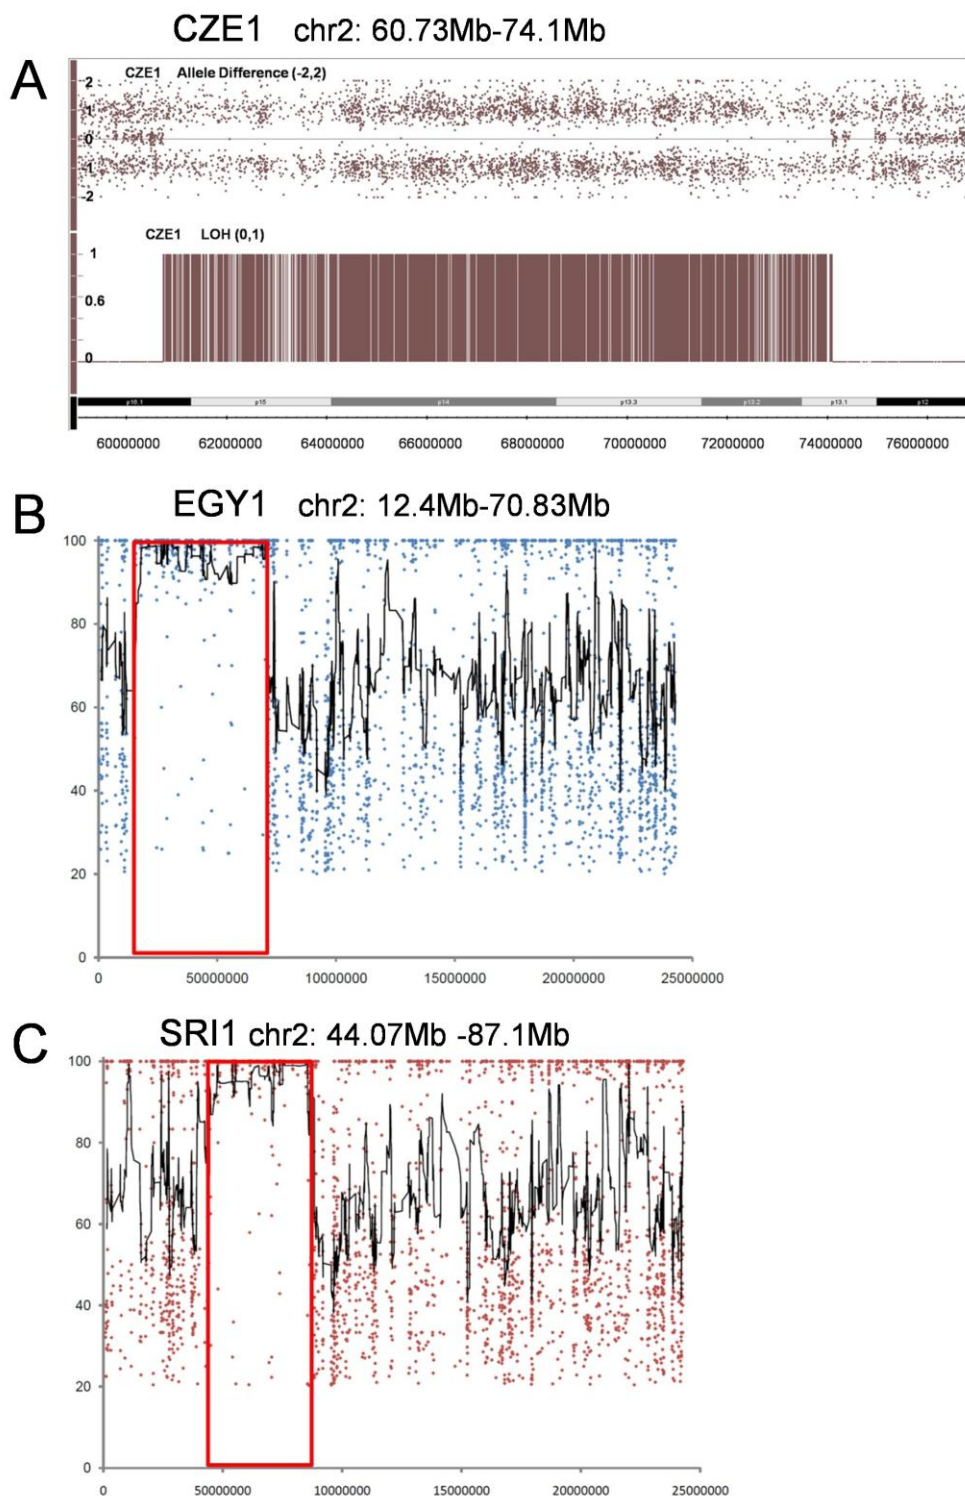

**Figure S1. Autozygous Regions on Chromosome 2 Identified in GAPO Cases from families CZE1, EGY1, and SRI1**

(A) Genotyping of the case CZE1, (II-1). DNA sample was genotyped using an Affymetrix GeneChip Mapping 6.0 Array (Affymetrix, Santa Clara, CA) at the microarray core facility of the Institute of Molecular Genetics in Prague according to the manufacturer's protocol. Raw feature intensities were extracted from the Affymetrix GeneChip Scanner 3000 7G images using the GeneChip Command Console Software 2.1. Individual SNP calls were generated using Affymetrix Genotyping Console Software 4.1. Copy number changes were identified in Affymetrix Genotyping Console Software (GTC version 4.1). Data from both SNP and copy number probes were used to identify copy number aberrations compared to built-in reference.

Only regions larger than 10 Kb containing at least 5 probes were reported. Extended homozygosity regions (ROHs) were identified in Affymetrix Genotyping Console Software version 4.1 using the algorithm comparing values from the user's sample set and SNP-specific distributions derived from a reference set of two hundred ethnically diverse individuals. Only regions larger than 3 Mb were reported. The minimal size of candidate homozygote regions was set empirically to effectively detect ROH in Affymetrix 6.0 data and to filter out ROHs most commonly found in population data. This approach should identify all "true and unique" ROHs in investigated individuals. It does not account for the degree of consanguinity. In consanguineous individuals the ROH regions are proportionally much larger<sup>1;2</sup>. (Upper line) shows presence of homozygous (values 1 and -1) and heterozygous genotypes (value 0) within the indicated genomic region on chromosome 2 (x-axis). (Lower line) shows likelihood that a SNP is in „region of heterozygosity state“ (ROH) state (value 1, dark line, indicates a significant (strong) likelihood of ROH).

(B and C) Autozygous regions identified by exome sequencing in cases EGY1, (V-3) and SRI1, (III-1). Individual dots represent non reference variants; x-axis defines genomic position of the variant, y-axis shows percentage of non reference reads from total reads covering the variant position. Black line shows a moving average of 20 consequent percentage values. Autozygous regions are highlighted by red boxes.

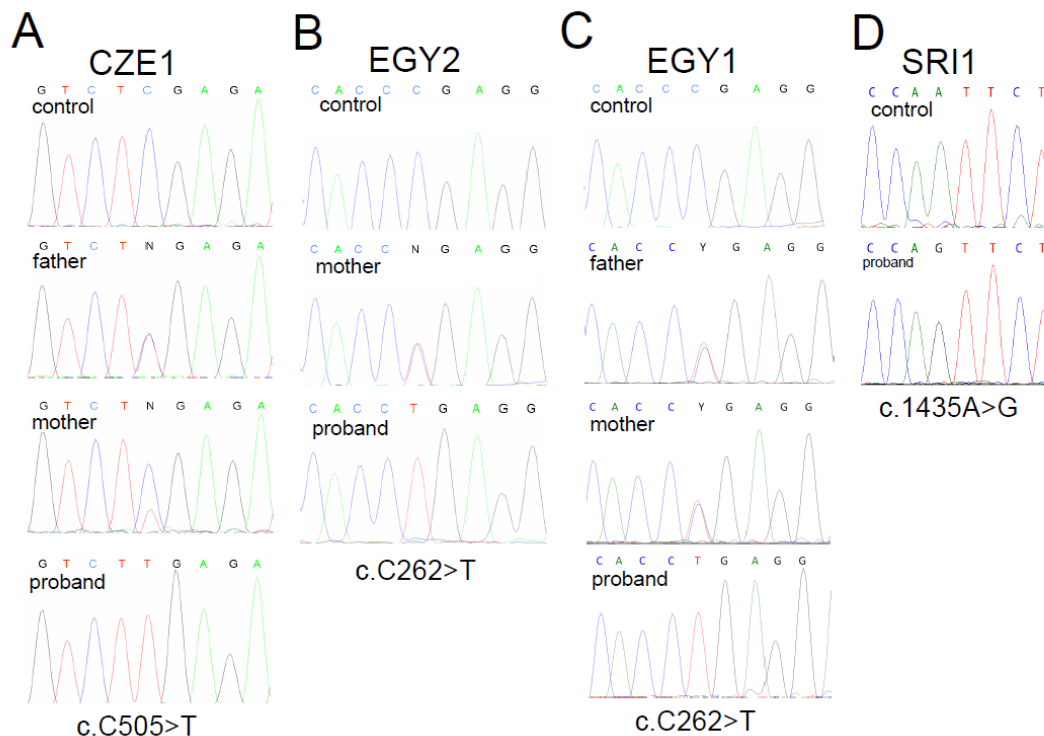

**Figure S2. Identification and Analysis of *ANTXR1* Mutation**

All of the exons with their corresponding exon-intron boundaries of the *ANTXR1* gene, were PCR amplified from genomic DNA of the probands and sequenced using a version 3.1 Dye Terminator cycle sequencing kit (Applied Biosystems, Foster City, CA) and electrophoresis on an ABI 3500XL Avant Genetic Analyzer (Applied Biosystems). Data were analyzed using Sequencing Analysis software. Segregation of the candidate mutations were assessed either by direct sequencing or restriction enzyme based analysis of the of the corresponding PCR amplified genomic DNA fragments. BsaJI and XhoI restriction enzymes (Fermentas, Vilnius, LT) were used for detection of (c.262C >T; p.Arg88\*) and (c.505C >T; p.Arg169\*) mutations, respectively. All primers were obtained from Generi Biotech (Hradec Kralove, Czech Republic) and their sequences are provided in Table S3.

(A) Chromatograms of *ANTXR1* genomic DNA sequences showing identified mutations in the Czech family. (Upper panel) Sequence of the unaffected individual, (middle panels) sequences showing heterozygous mutation c.505C>T in the father and mother, and (lower panel) sequence showing homozygous mutation c.505C>T in the proband II-1.

(B) Chromatograms of *ANTXR1* genomic DNA sequences showing identified mutations in the Egyptian family EGY2. (Upper panel) Sequence of the unaffected individual, (middle panels) sequences showing heterozygous mutation c.262C>T in the mother, and (lower panel) sequence showing homozygous mutation c.262C>T in the proband VI-4.

(C) Chromatograms of *ANTXR1* genomic DNA sequences showing identified mutations in the Egyptian family EGY1. (Upper panel) Sequence of the unaffected individual, (middle panels) sequences showing heterozygous mutation c.262C>T in the father and mother, and (lower panel) sequence showing homozygous mutation c.262C>T in the proband V-3.

(D) Chromatograms of *ANTXR1* genomic DNA sequences showing identified mutation in the family SRI1. (Upper panel) Sequence of the unaffected individual, and (lower panel) sequence showing homozygous mutation c.1435-12A>G in the proband III-1.

**A**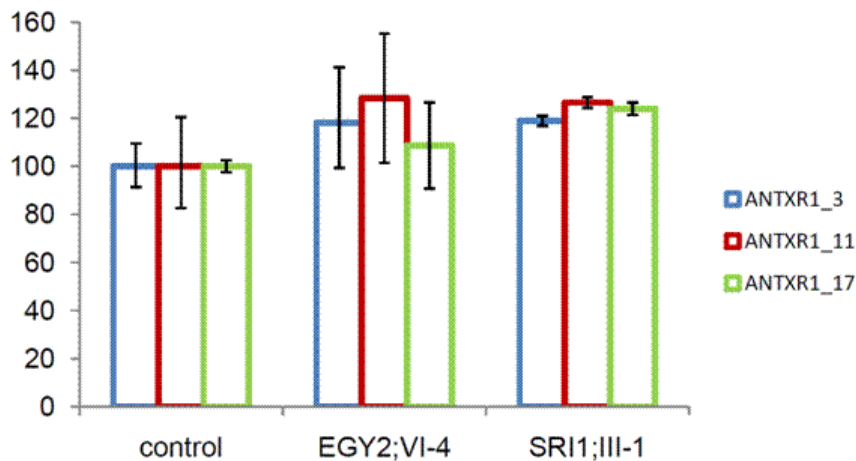**B**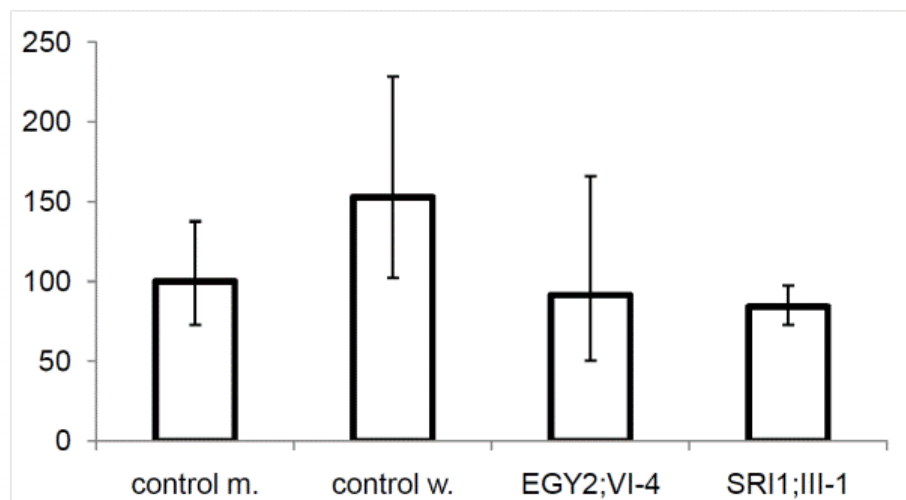**Figure S3. Quantitative PCR Analysis of Genomic DNA**

Quantitative PCR was carried out on a StepOne Plus Real Time System (Applied Biosystems). The reactions were carried out in a 96-well plate in a 20- $\mu$ l reaction volume containing 10  $\mu$ l of 2 $\times$ Maxima SYBR Green qPCR Master Mix (Thermo Scientific); 0.2  $\mu$ M of forward and reverse primer and 20ng of gDNA. The thermal profile for all SYBR Green PCRs was 95°C for 2 min, followed by 45 cycles of 95°C for 10 s, 53°C for 10 s and 72°C for 30 s. Each sample was analyzed three times in three replicates. Data were analyzed by StepOne Software v 2.0. The comparative Ct ( $\Delta\Delta$  Ct ) method was used to normalize target genomic fragments.

(A) Amounts of *ANTXR1* exon 3 and mutation harboring exons 11 and 17 relative to exon 12 of autosomal *JUP* in control and indicated cases.

(B) Amounts of the X-linked *FHL1* exon 3 relative to the *ANTXR1* exon 3 in control male (m.), control female (f.) and indicated cases. The means  $\pm$  SD of three experiments performed in triplicates are shown.



(A) The Alamut (San Diego, CA, U.S.A.) splicing window was used to predict possible effects of the non-coding c.1435-12A>G *ANTXR1* mutation on RNA splicing. This comprises the in silico prediction of the programs SpliceSiteFinder, MaxEntScan, NNSPLICE, GeneSplicer and Human Splicing Finder. All programs (listed on the left) predicted that the A>G nucleotide change creates a novel strong splice acceptor site, that will be preferentially used compared to the original splice acceptor.

(B) The ESE finder software predicts a difference in the binding of the spliceosome induced by the nucleotide change and suggests creation of a new splice acceptor site located 11 bases upstream from the last exon of *ANTXR1*. This novel site is very likely used in patient SRI1,III-1 and hypothetically results in an insertion of 11 additional nucleotides into *ANTXR1* mRNA

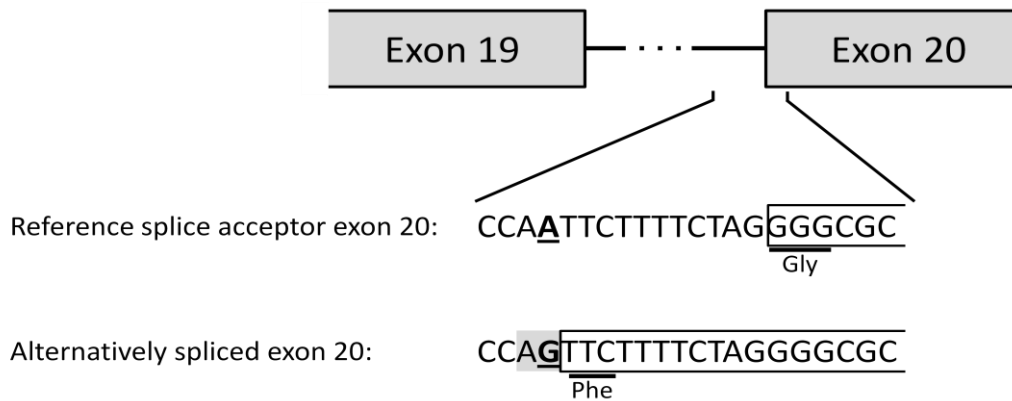

**Figure S5. Predicted Effect of the c.1435-12A>G Mutation on *ANTXR1* mRNA Splicing and *ANTXR1* Biosynthesis**

The homozygous substitution c.1435-12A>G identified in proband III-1 from family SRI1 is predicted to create a new splice acceptor for the last exon of *ANTXR1* (grey boxed AG), resulting in an alternatively spliced last exon that is out of frame. The mutant transcript is predicted to encode for proteosynthesis of a truncated *ANTXR1* containing 118 unique amino acids on its C-terminus, p.Gly479Phefs\*119.



| Chromosome | Start position | SNP id      | V-3  | VI-6    | Gene name     |
|------------|----------------|-------------|------|---------|---------------|
|            |                |             | EGY1 | EGY2    |               |
| chr2       | 69201894       | rs4417751   | T/T  | T/T     | <i>GKNI</i>   |
| chr2       | 69204964       | n.e.        | A/A  | C/C     | <i>GKNI</i>   |
| chr2       | 69271911       | c.262C>T    | T/T  | T/T     | <i>ANTXR1</i> |
| chr2       | 69300274       | rs113138542 | T/T  | C/C     | <i>ANTXR1</i> |
| chr2       | 69317925       | rs4854546   | A/A  | missing | <i>ANTXR1</i> |
| chr2       | 69330118       | rs6710260   | G/G  | G/G     | <i>ANTXR1</i> |
| chr2       | 69420591       | rs62134900  | A/A  | T/T     | <i>ANTXR1</i> |
| chr2       | 69472419       | rs72903177  | T/T  | C/C     | <i>ANTXR1</i> |
| chr2       | 69472633       | rs72903178  | G/G  | C/C     | <i>ANTXR1</i> |

**Figure S6. Autozygous Haplotypes across the *ANTXR1* Genomic Region Obtained by Exome Sequencing in Case V-3 from Family EGY1 and Sanger Sequencing in Case VI-6 from Family EGY2**

Colored boxes show non-concordant genotypes between probands V-3 and VI-6 from families EGY1 and EGY2, respectively. Hypothetical haploinsufficiency around the c.262C>T (p.Arg88\*) mutation in *ANTXR1* was excluded in VI-6 by using quantitative PCR of the corresponding genomic fragment (Figure S3). All coordinates refer to hg19; n.e. – non existing; missing – the position was not analyzed.

**Table S1. Sequence Variants Revealed by Exome Sequencing in Proband**

| <b>Individual</b>                                                                                                                         | <b>CZE1, II-1</b>                                | <b>EGY1, V-3</b>                                                                                                                         | <b>SRI1, III-1</b>                                                                                            |
|-------------------------------------------------------------------------------------------------------------------------------------------|--------------------------------------------------|------------------------------------------------------------------------------------------------------------------------------------------|---------------------------------------------------------------------------------------------------------------|
| <b>Exome Sequencing Statistics</b>                                                                                                        |                                                  |                                                                                                                                          |                                                                                                               |
| Total Gb of sequence                                                                                                                      | 6.2                                              | 6.1                                                                                                                                      | 6.3                                                                                                           |
| Median coverage                                                                                                                           | -                                                | 72.7                                                                                                                                     | 72.2                                                                                                          |
| Average coverage                                                                                                                          | 16.1                                             | 92.4                                                                                                                                     | 93.7                                                                                                          |
| <b>Variant Statistics</b>                                                                                                                 |                                                  |                                                                                                                                          |                                                                                                               |
| Total number of coding and splice site (SA20nt, SD8nt) variants and indels                                                                | 15325                                            | 19969*                                                                                                                                   | 19861*                                                                                                        |
| Number of non-synonymous, splice-site variants and indels                                                                                 | 8195                                             | 11140                                                                                                                                    | 11137                                                                                                         |
| Variants not present in internal exome database nor in dbSNP                                                                              | 560                                              | 242**                                                                                                                                    | 312**                                                                                                         |
| Novel variants and variants with allele frequency < 0.1 % in EVS database                                                                 | 121                                              | NA                                                                                                                                       | NA                                                                                                            |
| Heterozygous variants                                                                                                                     | 118                                              | 227                                                                                                                                      | 284                                                                                                           |
| Homozygous variants ( $\geq 80\%$ variation)                                                                                              | 3 ( <i>ANTXR1</i> , <i>ZRSR2</i> , <i>DRP2</i> ) | 15                                                                                                                                       | 28                                                                                                            |
| Homozygous variants located in ROH regions                                                                                                | 1 ( <i>ANTXR1</i> )                              | NA                                                                                                                                       | NA                                                                                                            |
| Genes with homozygous variants in both individuals                                                                                        | NA                                               | 1 ( <i>ANTXR1</i> )                                                                                                                      | 1 ( <i>ANTXR1</i> )                                                                                           |
| Homozygous variants located in overlapping ROH region on chromosome 2                                                                     | <b>1 (<i>ANTXR1</i>)</b>                         | <b>1 (<i>ANTXR1</i>)</b>                                                                                                                 | <b>1 (<i>ANTXR1</i>)</b>                                                                                      |
| Genes with possible compound heterozygous variants                                                                                        | 0                                                | 9 ( <i>DIAPH3</i> , <i>DNAH17</i> , <i>EVC2</i> , <i>KAT2A</i> , <i>MIR320A</i> , <i>NEB</i> , <i>PEG3</i> , <i>RAB24</i> , <i>TTN</i> ) | 7 ( <i>ZNF679</i> , <i>TTN</i> , <i>TDR9</i> , <i>RNF213</i> , <i>MYOF</i> , <i>AGXT2L2</i> , <i>ACSBG2</i> ) |
| *at least 5 variant reads, at least 20% variation; ** filtered against dbSNP134, and Nijmegen in-house database consisting of 1154 exomes |                                                  |                                                                                                                                          |                                                                                                               |

**Table S2. Private or Rare Homozygous Variants Identified by Exome Sequencing in Probands with GAPO Syndrome**

| Chromosome  | Position        | Reference | Observed | Gene          | Accession        | cDNA Nucleotide Change | Amino Acid Change                  | SIFT      | PolyPhen-2  |
|-------------|-----------------|-----------|----------|---------------|------------------|------------------------|------------------------------------|-----------|-------------|
| <b>CZE1</b> |                 |           |          |               |                  |                        |                                    |           |             |
| <b>2</b>    | <b>69302734</b> | <b>C</b>  | <b>T</b> | <b>ANTXR1</b> | <b>NM_018153</b> | <b>c.505C&gt;T</b>     | <b>p.(R169*)</b>                   | <b>1</b>  | <b>0.73</b> |
| X           | 15841060        | A         | G        | ZRSR2         | NM_005089        | c.1144A>G              | p.(N382D)                          | 0.63      | 0           |
| X           | 100486731       | G         | A        | DRP2          | NM_001939        | c.95G>A                | p.(R32Q)                           | 0.03      | 0.08        |
| <b>EGY1</b> |                 |           |          |               |                  |                        |                                    |           |             |
| 1           | 48708279        | C         | T        | SLC5A9        | NM_001135181     | c.1903C>T              | p.(Q635*)                          | NA        | NA          |
| 1           | 53730071        | T         | C        | LRP8          | NM_004631        | c.1428-3A>G            | p.(?)                              | NA        | NA          |
| 2           | 39213197        | G         | A        | SOS1          | NM_005633        | c.3770C>T              | p.(T1257I)                         | 0.08      | 0.180       |
| 2           | 27456285        | C         | T        | CAD           | NM_004341        | c.3097C>T              | p.(R1033W)                         | 0.00      | 0.999       |
| <b>2</b>    | <b>69271911</b> | <b>C</b>  | <b>T</b> | <b>ANTXR1</b> | <b>NM_032208</b> | <b>c.262C&gt;T</b>     | <b>p.(R88*)</b>                    | <b>NA</b> | <b>NA</b>   |
| 3           | 112993378       | G         | C        | BOC           | NM_033254        | c.1391G>C              | p.(G464A)                          | 0.69      | 0.000       |
| 3           | 113286517       | T         | C        | SIDT1         | NM_017699        | c.475T>C               | p.(Y159H)                          | 0.00      | 0.999       |
| 3           | 52413972        | C         | T        | DNAH1         | NM_015512        | c.7429C>T              | p.(R2477W)                         | 0.03      | NA          |
| 5           | 141248861       | C         | T        | PCDH1         | NM_032420        | c.176G>A               | p.(R59Q)                           | 0.26      | 0.079       |
| 8           | 145741246       | C         | A        | RECQL4        | NM_004260        | c.1160G>A              | p.(G387V)                          | NA        | NA          |
| 12          | 83290338        | T         | A        | TMTC2         | NM_152588        | c.1396T>A              | p.(Y466N)                          | 0.24      | 0.012       |
| 12          | 48137331        | T         | C        | RAPGEF3       | NM_001098531     | c.1807A>G              | p.(K603E)                          | 0.60      | 0.993       |
| 15          | 71128690        | C         | T        | LARP6         | NM_018357        | c.355G>A               | p.(V119M)                          | 0.00      | 1.000       |
| X           | 20153979        | A         | C        | EIF1AX        | NM_001412        | c.101-20T>G            | p.(?)                              | NA        | NA          |
| X           | 151814027       | G         | A        | GABRQ         | NM_018558        | c.278G>A               | p.(S93N)                           | 0.00      | 0.010       |
| <b>SRI1</b> |                 |           |          |               |                  |                        |                                    |           |             |
| 1           | 79095563        | C         | G        | IFI44L        | NM_006820        | c.686C>G               | p.(A229G)                          | 0.12      | 0.974       |
| 2           | 47202157        | G         | T        | TTC7A         | NM_020458        | c.563G>T               | p.(R188L)                          | 0.03      | 1.000       |
| 2           | 55467328        | T         | C        | MTIF2         | NM_001005369     | c.1706-17A>G           | p.(?)                              | NA        | NA          |
| 2           | 61433921        | G         | C        | USP34         | NM_014709        | c.9020C>G              | p.(S3007C)                         | 0.01      | 0.838       |
| 2           | 68772333        | A         | G        | APLF          | NM_173545        | c.1175A>G              | p.(H392R)                          | 0.00      | 0.999       |
| <b>2</b>    | <b>69472345</b> | <b>A</b>  | <b>G</b> | <b>ANTXR1</b> | <b>NM_032208</b> | <b>c.1435-12A&gt;G</b> | <b>p.(G479Ffs*119)<sup>#</sup></b> | <b>NA</b> | <b>NA</b>   |
| 2           | 73676617        | C         | G        | ALMS1         | NM_015120        | c.2960G>C              | p.(T987S)                          | 0.00      | 0.999       |
| 2           | 87085549        | G         | T        | CD8B          | NM_172102        | c.44-10C>A             | p.(?)                              | NA        | NA          |
| 2           | 53927538        | A         | G        | ASB3          | NM_001164165     | c.1222T>C              | p.(S408P)                          | 0.03      | 0.658       |
| 2           | 55056583        | T         | G        | EML6          | NM_001039753     | c.816T>G               | p.(I272M)                          | 0.07      | 0.997       |
| 4           | 951715          | T         | C        | TMEM175       | NM_032326        | c.946T>C               | p.(S316P)                          | 0.00      | 1.000       |
| 4           | 114899966       | G         | T        | ARSJ          | NM_024590        | c.25C>A                | p.(H9N)                            | 0.39      | 0.001       |
| 4           | 1834464         | G         | A        | LETM1         | NM_012318        | c.1080+7C>T            | p.(?)                              | NA        | NA          |
| 4           | 144917458       | C         | T        | GYPB          | NM_002100        | c.271-1G>A             | p.(?)                              | NA        | NA          |
| 8           | 17447157        | A         | G        | PDGFRL        | NM_006207        | c.236A>G               | p.(K79R)                           | 0.25      | 0.016       |
| 8           | 42042616        | G         | T        | PLAT          | NM_000930        | c.614C>A               | p.(T205N)                          | 0.04      | 0.828       |
| 10          | 118236315       | G         | A        | PNLIPRP3      | NM_001011709     | c.1324G>A              | p.(G442R)                          | 0.16      | 0.985       |
| 10          | 50190609        | G         | A        | WDFY4         | NM_020945        | c.9544G>A              | p.(A3182T)                         | 0.09      | 0.003       |
| 11          | 74554471        | C         | T        | XRRRA1        | NM_182969        | c.2153G>A              | p.(R718Q)                          | 1.00      | 0.008       |

|    |           |   |   |                |              |              |           |      |       |
|----|-----------|---|---|----------------|--------------|--------------|-----------|------|-------|
| 11 | 75160580  | C | T | <i>GDPD5</i>   | NM_030792    | c.550G>A     | p.(A184T) | 0.22 | 0.219 |
| 11 | 101762300 | C | G | <i>ANGPTL5</i> | NM_178127    | c.877G>C     | p.(D293H) | 0.01 | 0.808 |
| 17 | 56283513  | C | T | <i>MKSI</i>    | NM_017777    | c.1607G>A    | p.(R536Q) | 0.00 | 1.000 |
| 19 | 42383347  | C | T | <i>CD79A</i>   | NM_001783    | c.367C>T     | p.(L123F) | 0.00 | 1.000 |
| X  | 36162799  | G | A | <i>CXorf59</i> | NM_173695    | c.1382G>A    | p.(R461K) | 0.56 | 0.880 |
| X  | 39921666  | C | T | <i>BCOR</i>    | NM_017745    | c.4072-20G>A | p.(?)     | NA   | NA    |
| X  | 131762517 | G | A | <i>HS6ST2</i>  | NM_001077188 | c.1552G>A    | p.(R558C) | 0.50 | 0.883 |
| X  | 134713730 | G | A | <i>DDX26B</i>  | NM_182540    | 2026G>A      | p.(D676N) | 0.28 | 0.003 |
| X  | 152959970 | C | T | <i>SLC6A8</i>  | NM_001142805 | c.1466-18C>T | p.(?)     | NA   | NA    |

---

All coordinates refer to hg19; # based on prediction of Alamut splicing window *in silico* prediction; NA - not analyzed.

**Table S3. Oligonucleotides Used in This Study**

| <b>Primers for PCR Amplification of Coding Regions of <i>ANTXR1</i></b> |                         |                         |
|-------------------------------------------------------------------------|-------------------------|-------------------------|
| <b>Name</b>                                                             | <b>Sequence 5' - 3'</b> | <b>Genomic Position</b> |
| ANTXR1_1F                                                               | GAATAAAGGACCCGCGAGGAA   | 2:69240523-69240543     |
| ANTXR1_1R                                                               | CAACAAAGGCGCAGCACTCCG   | 2:69240924-69240944     |
| ANTXR1_2F                                                               | GAACCCTAACAGAAAGTTGAA   | 2:69266997-69267017     |
| ANTXR1_2R                                                               | GAGAAGGGAGAATGCTAAATA   | 2:69267479-69267499     |
| ANTXR1_3F                                                               | TTCAGTTCTGGCAGCCGTGAT   | 2:69271766-69271786     |
| ANTXR1_3R                                                               | ACCCATGTGCCCATACGTAAG   | 2:69272082-69272102     |
| ANTXR1_45F                                                              | TCCTGTGTTATGGTTGACCCT   | 2:69297598-69297618     |
| ANTXR1_45R                                                              | GAATTTGACCCAATACATGCC   | 2:69299081-69299101     |
| ANTXR1_6F                                                               | ATTGACTTTGGGTGGTTGAAC   | 2:69300047-69300067     |
| ANTXR1_6R                                                               | AAAGGGGAAAACATTTACCAT   | 2:69300420-69300440     |
| ANTXR1_7F                                                               | AAGCCCTTCATCAAGACTCTA   | 2:69302482-69302502     |
| ANTXR1_7R                                                               | CTTTTGACATCCTGGCAATTT   | 2:69303027-69303047     |
| ANTXR1_8F                                                               | TAAAAGCTGGAGCCAACCCTT   | 2:69304321-69304341     |
| ANTXR1_8R                                                               | CCACAGTCTGCCCAGTTAGGA   | 2:69304889-69304909     |
| ANTXR1_9F                                                               | CCCAACAGCATCTAGCACAAT   | 2:69317791-69317811     |
| ANTXR1_9R                                                               | TGCTTGGATTACAGGCATAAG   | 2:69318305-69318325     |
| ANTXR1_10F                                                              | GAAGGTGTTCTGCGTTAGGAG   | 2:69329702-69329722     |
| ANTXR1_10R                                                              | TGACTGGAACCACTGTAAGGG   | 2:69330221-69330241     |
| ANTXR1_11F                                                              | TTTCTGTCCTTGCGATAGTTT   | 2:69349983-69350003     |
| ANTXR1_11R                                                              | GCTCCACTTTCTCTAGATGCT   | 2:69350294-69350314     |
| ANTXR1_12F                                                              | CTTTAAAGGAGGATGGGCTAT   | 2:69351497-69351517     |
| ANTXR1_12R                                                              | GTACAGCACACCCAATCCAG    | 2:69351934-69351954     |
| ANTXR1_13F                                                              | GAGCCTTAAATCTGCATATCA   | 2:69379205-69379225     |
| ANTXR1_13R                                                              | TGGCAATCTCACACCCTAACT   | 2:69379587-69379607     |
| ANTXR1_14F                                                              | AAACCAGAAGAGACGCAAATG   | 2:69397148-69397168     |
| ANTXR1_14R                                                              | TGCTCTGCAGGGGGCTAAGTG   | 2:69397497-69397517     |
| ANTXR1_1516F                                                            | AGTGATTGGCCCAAGGTTCTA   | 2:69408764-69408784     |
| ANTXR1_1516R                                                            | TGATAAGCTGGGTTTTAGGTT   | 2:69409883-69409903     |
| ANTXR1_17F                                                              | TGACTGAAGAAGCACGGAAAG   | 2:69420374-69420394     |

|            |                       |                     |
|------------|-----------------------|---------------------|
| ANTXR1_17R | GCAACATGAAATAATAGCTGG | 2:69420708-69420728 |
| ANTXR1_18F | AGCACCCAGTTAAGGTCAGTC | 2:69472088-69472108 |
| ANTXR1_18R | TCATTTGTTTTCTGGCAATTT | 2:69472793-69472813 |

**Primers for RT-PCR Amplification of *ANTXR1* cDNA**

|               |                        |                     |
|---------------|------------------------|---------------------|
| cANTXR1_1F    | CCTGAGGGTCGTGGCGAGTTC  | 2:69240564-69240584 |
| cANTXR1_1R    | TAGGCGCTGGACACAGTAAAT  | 2:69350179-69350199 |
| cANTXR1_ex1F  | ATGGCCACGGCGGAGCGGAGA  | 2:69240632-69240652 |
| cANTXR1_ex1R  | AGGTCAAATCCGCCGTAGCAG  | 2:69240745-69240765 |
| cANTXR1_ex3R  | TTAAGGTTGTTTCCTCGGGTGG | 2:69271906-69271926 |
| cANTXR1_ex56R | CGCTGGCTGTCCTGTACCCTT  | 2:69300152-69300171 |
| cANTXR1_v3R   | GAGGGAGCAGGCGGTATTCTC  | 2:69372511-69372531 |
| cANTXR1_v2R   | CGTTGCACGGGCTGTGTTAGG  | 2:69399556-69399576 |
| cANTXR1_v1R   | AGGTGTGGTAGGCGTTGTTGA  | 2:69472412-69472432 |

**Primers for Quantitative PCR of *GAPDH* and *ANTXR1* cDNA**

|              |                        |                     |
|--------------|------------------------|---------------------|
| GAPDH_c_F    | GGATTTGGTCGTATTGGGCG   | 12:6645877-6645897  |
| GAPDH_c_R    | TCGCCCCACTTGATTTTGA    | 12:6646096-6646115  |
| cANTXR1_ex1F | ATGGCCACGGCGGAGCGGAGA  | 2:69240632-69240652 |
| cANTXR1_ex3R | TTAAGGTTGTTTCCTCGGGTGG | 2:69271906-69271926 |

**Primers for Quantitative PCR Analysis of the Genomic Fragment Spanning *ANTXR1* Mutations**

|            |                       |                       |
|------------|-----------------------|-----------------------|
| JUP_12R    | GGAGACCCCCAAAAGTGTTGC | 17:39913588-39913608  |
| JUP_12F    | GGCCCCACTCATGGAGTTGCT | 17:39913909-39913929  |
| ANTXR1_3F  | TTCAGTTCTGGCAGCCGTGAT | 2:69271766-69271786   |
| ANTXR1_3R  | ACCCATGTGCCCATACGTAAG | 2:69272082-69272102   |
| ANTXR1_11F | TTTCTGTCCTTGCGATAGTTT | 2:69349983-69350003   |
| ANTXR1_11R | GCTCCACTTTCTCTAGATGCT | 2:69350294-69350314   |
| ANTXR1_17F | TGACTGAAGAAGCACGGAAAG | 2:69420374-69420394   |
| ANTXR1_17R | GCAACATGAAATAATAGCTGG | 2:69420708-69420728   |
| FHL1_ex6U  | GGCTCACCTTCTCCGAGCCTT | X:135290422-135290442 |
| FHL1_ex6L  | TGTATTGCAAAGGCTAACCTG | X:135290969-135290989 |

## References

1. Littink, K.W., Koenekoop, R.K., van den Born, L.I., Collin, R.W., Moruz, L., Veltman, J.A., Roosing, S., Zonneveld, M.N., Omar, A., Darvish, M., et al. (2010). Homozygosity mapping in patients with cone-rod dystrophy: novel mutations and clinical characterizations. *Invest Ophthalmol Vis Sci* 51, 5943-5951.
2. Woods, C.G., Cox, J., Springell, K., Hampshire, D.J., Mohamed, M.D., McKibbin, M., Stern, R., Raymond, F.L., Sandford, R., Malik Sharif, S., et al. (2006). Quantification of homozygosity in consanguineous individuals with autosomal recessive disease. *American journal of human genetics* 78, 889-896.
